# Supplementary material
Source: Springer Nature journal article supplement (https://www.springermedizin.de/resource/supplementary/12889_2012_5037_MOESM2_ESM.pdf/9496106)
Supplement: MOESM2 [file 9496106]

Community

Hospital

Telephone

Local Clinic Sites

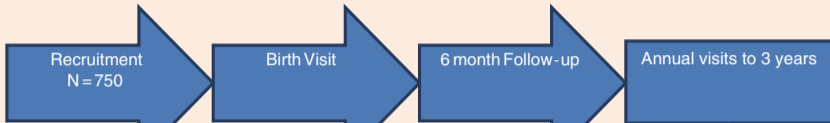

Year 1-2

Year 1-3

Year 1-3

Year 2-5

**Questionnaires**  
**Anthropometric**  
**measures**  
**Blood - Storage**  
**OGTT**

**Birth Outcomes**  
**Anthropometric**  
**measures**  
**Cord Blood**

**Baby:**  
**Diet**  
**Activity**  
**Sleep**

**Mother/Baby:**  
**Questionnaires**  
**Anthropometric**  
**measures**
